# Supplementary material for: One-step synthesis of cross-linked and hollow microporous organic–inorganic hybrid nanoreactors for selective redox reactions
Source: Royal Society of Chemistry journal article supplement (doi:10.1039/c9nr04456f), 2019-01-01
Supplement: c9nr04456f1.pdf [file c9nr04456f1.pdf]

## Supporting Information for

# One-Step Synthesis of Cross-Linked and Hollow Microporous Organic-Inorganic Hybrid Nanoreactors for Selective Redox Reactions

Fei Wang,<sup>a</sup> Jing Liu,<sup>a</sup> Daquan Wang,<sup>a</sup> Zhiwei Yang,<sup>a</sup> Kai Yan<sup>a</sup> and Lingjie Meng<sup>\*a,b</sup>

<sup>a</sup> School of Science, Xi'an Key Laboratory of Sustainable Energy Material Chemistry, MOE Key Laboratory for Nonequilibrium Synthesis and Modulation of Condensed Materials, Xi'an Jiaotong University, Xi'an 710049, P. R. China. E-mail: menglingjie@mail.xjtu.edu.cn

<sup>b</sup> Instrumental analysis center, Xi'an Jiaotong University, Xi'an 710049, P. R. China

## Supplementary Figure

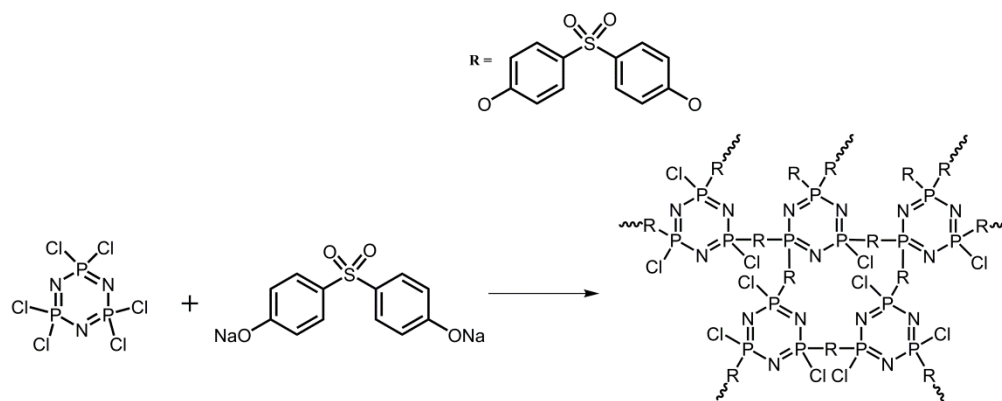

**Figure S1.** Illustration of the polymerization of PZS.

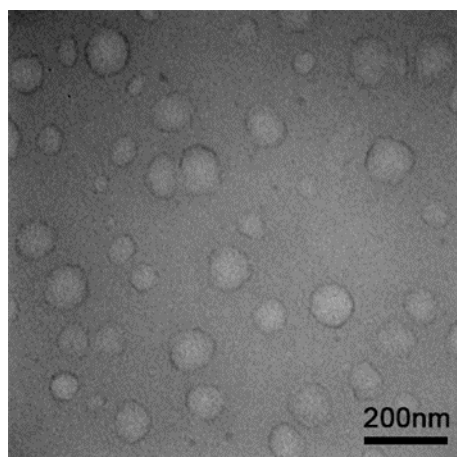

**Figure S2.** TEM image of the PZS HMNs after adding NaOH solution (5 ml, 0.05 M) for 1.5 min.

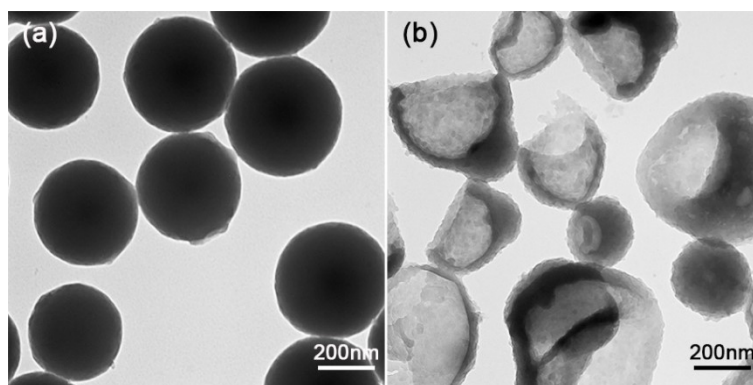

**Figure S3.** TEM image of the PZS nanomaterials after adding 5 mL NaOH solution: (a) 0.025M, and (b) 0.063M.

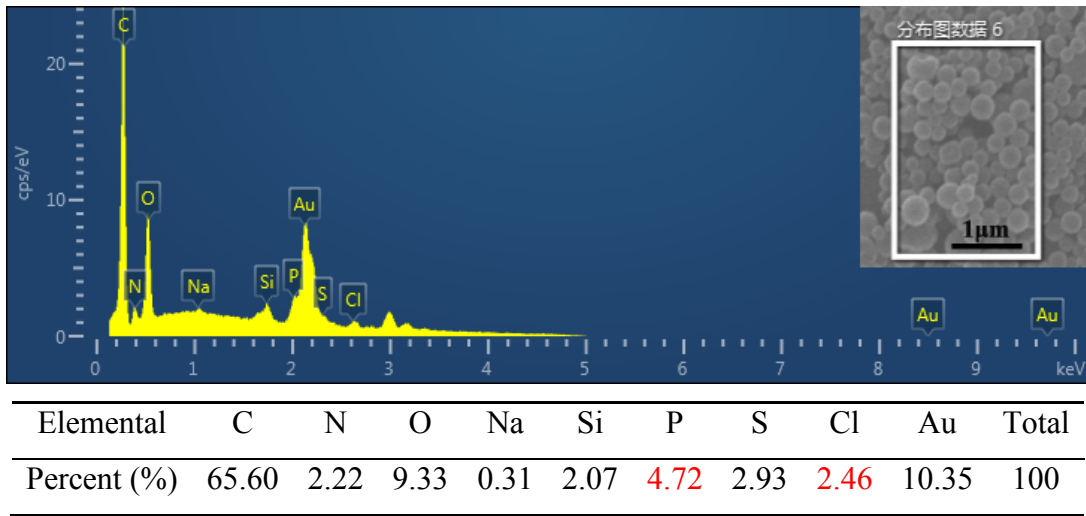

**Figure S4.** EDS analysis of PZS nanoshells (white box region in SEM image). Each analysis corresponds to an area of ca. 5–6  $\mu\text{m}^2$ .

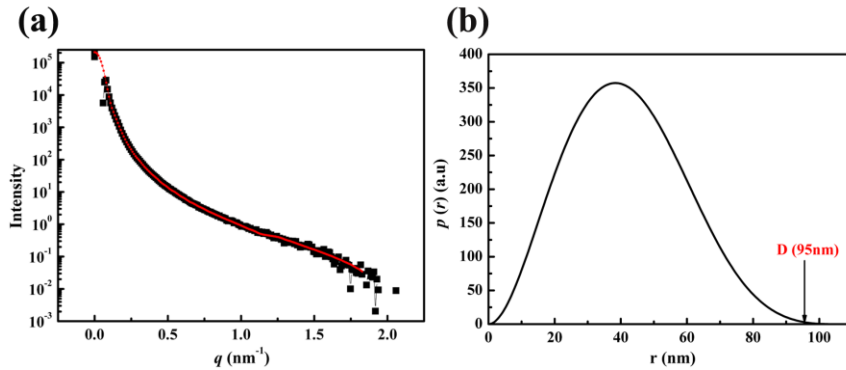

**Figure S5.** (a) Morphological characterization of PZS nanoshells by small-angle X-ray scattering. The radius of gyration ( $R_g$ ) determined by Guinier analysis. (b) Pair distance distribution functions (PDDFs),  $D = 95 \text{ nm}$ .

The  $p(r)$  functions are calculated using following fomular.

$$P(q) = 4\pi \int_{-\infty}^{\infty} (p)r \frac{\sin(qr)}{r} dr$$

**Table S1.** Zeta Potentials of Pt@PZS and PZS suspensions in water.

| Sample | Zeta Potential <sup>a</sup> (mV 25°C) |
|--------|---------------------------------------|
| Pt@PZS | -30±0.41                              |
| PZS    | -26±0.30                              |

<sup>a</sup> Values are averaged from three measurements.

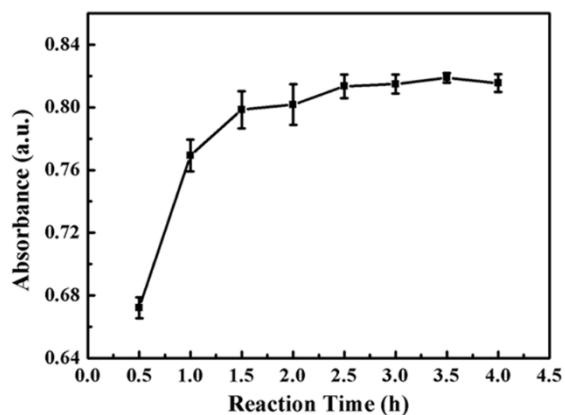

**Figure S6.** Time-dependent absorbance changes at 650 nm for the oxidation of TMB catalysed by the Pt@PZS in NaAc buffer (pH 4.0) at room temperature. TMB: 0.25 mM.

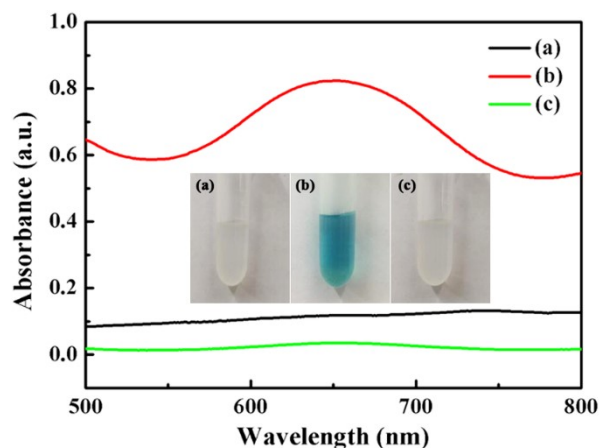

**Figure S7.** UV-vis absorption spectra of TMB solutions reacting for 4h in the presence of Pt@PZS and the inset corresponds to photography of (a) the TMB solutions (b) the TMB solutions after reaction in the presence of the Pt@PZS, (c) Pt@PZS after centrifuging and washing by ethanol.
